# Supplementary material for: Ulvan, a Sulfated Polysaccharide from Green Algae, Activates Plant Immunity through the Jasmonic Acid Signaling Pathway
Source: Hindawi journal article supplement (doi:10.1155/2010/525291), 2010-01-01
Supplement: f1 [file 525291.f1.pdf]

690 **Supplemental data files**

691

692 Table S1. List of up-regulated genes after ulvan treatment (ratio $\geq$ 2)

693 Table S2. List of down-regulated genes after ulvan treatment (ratio $\leq$ 0.5)

694 Table S3. List of up-regulated genes after ulvan and MeJA treatments (ratio $\geq$ 1.5)

695 Table S4. List of down-regulated genes after ulvan and MeJA treatments (ratio $\leq$ 0.67)

696

697
